# Supplementary material
Source: publisher figshare collection journal article supplement (https://karger.figshare.com/ndownloader/files/24780587)
Supplement: Supplementary file 1 [file 24780587]

Supplementary Material

Table S1. Demographic information, health numeracy, and cognitive measures in participants with low to average education (Subgroup A: ≤ 12 y) and participants with high education (Subgroup B: >12 y).

|  |  | Subgroup A  n = 43 | | Subgroup B  n = 27 | |  |
| --- | --- | --- | --- | --- | --- | --- |
|  | Max. score | M | SD | M | SD | p-value |
| Age |  | 76.16 | 4.41 | 75.04 | 4.68 | .314a |
| Gender (m:f) |  | 9:34 |  | 15:12 |  | .003b |
| Health numeracy task | 12 | 8.51 | 2.18 | 9.78 | 1.48 | .005a |
| Mental calculation | 16 | 14.47 | 1.71 | 14.89 | 1.34 | .278a |
| FAB total score | 18 | 16.65 | 1.04 | 17.33 | 0.78 | .005a |
| CERAD battery |  |  |  |  |  |  |
| MMSE | 30 | 29.07 | 0.77 | 29.22 | 0.75 | .418a |
| Verbal fluency (animals/min) |  | 26.16 | 5.20 | 28.85 | 5.82 | .048a |
| Naming to confrontation | 15 | 14.44 | 0.70 | 14.78 | 0.51 | .023a |
| Copying geometrical figures | 11 | 10.19 | 0.66 | 10.48 | 0.51 | .052a |
| Verbal learning | 30 | 21.56 | 3.56 | 23.81 | 3.64 | .013a |
| Free recall words | 10 | 7.74 | 1.48 | 8.52 | 1.42 | .034a |
| Recognition (correct minus false positive) | 10 | 9.79 | 0.51 | 9.78 | 0.51 | .918a |
| Free recall figures | 11 | 9.07 | 2.03 | 9.56 | 1.58 | .293a |

Note. (a) Independent-sample t-test; (b) Chi2 test; M = mean; SD = standard deviation; Min = minimum score; Max = maximum score; FAB = Frontal Assessment Battery; CERAD = Consortium to Establish a Registry of Alzheimer's Disease; MMSE = Mini Mental State Examination.

Table S2. Overview of hemispheric areas of significant positive correlations between health numeracy scores and cortical thickness in participants with participants with high education (Subgroup B: >12 y).

| Cerebral region | Cluster size (number of significant vertices) | MNI  coordinates | | | t-value | p-value FWE-corrected  at cluster level | Height  threshold |
| --- | --- | --- | --- | --- | --- | --- | --- |
| X | Y | Z |
| Right hemisphere |  |  |  |  |  |  |  |
| Medial portion of the superior frontal gyrus extending to medial orbitofrontal gyrus and rostral anterior cingulate gyrus | 471 | 11  8  11 | 52  61  42 | 1  7  8 | 3.56  3.48  2.82 | 0.017 | 0.01 |
| Superior temporal gyrus extending to supramarginal gyrus and bankssts | 374 | 64  56 | -38  -27 | 12  9 | 3.85  3.08 | 0.058 | 0.01 |
| Left hemisphere  Medial orbitofrontal gyrus extending to lateral orbitofrontral gyrus | 400 | -12  -9  -3 | 21  10  46 | -16  -17  -12 | 3.54  3.50  2.78 | 0.042 | 0.01 |

Note. MNI = Montreal Neurological Institute; FWE = Family-wise error. Results of participants with low to average education (Subgroup A: ≤ 12 y) were not significant at α = .01 (FWE-corrected). [The dmPFC cluster was only significant at α = .05 (FWE-corrected)].
